# Supplementary material for: Neurologic Abnormalities in Mouse Models of the Lysosomal Storage Disorders Mucolipidosis II and Mucolipidosis III γ
Source: PubMed Central journal article supplement (PMC4196941; doi:10.1371/journal.pone.0109768), 2014-10-14
Supplement: pone.0109768.s001.pdf [file pone.0109768.s001.pdf]

Table S1. Significant ANOVA effects involving genotype (Geno) and sex variables from the sensorimotor battery and rotarod test in 1-month and 4-5 months old *Gnptab*<sup>-/-</sup> and WT mice.

| <u>Test (Age)</u>         | <u>Effect</u>                                                                                                                                             | <u>F Statistics</u>                                                                                                                                                                                                                                            |
|---------------------------|-----------------------------------------------------------------------------------------------------------------------------------------------------------|----------------------------------------------------------------------------------------------------------------------------------------------------------------------------------------------------------------------------------------------------------------|
| Sensorimotor Battery      |                                                                                                                                                           |                                                                                                                                                                                                                                                                |
| Platform (1 mo)           | Geno                                                                                                                                                      | $F_{(1,24)}=5.66, p=0.026$                                                                                                                                                                                                                                     |
| Pole (1 mo)               | Geno                                                                                                                                                      | $F_{(1,24)}=15.15, p=0.0007$                                                                                                                                                                                                                                   |
| Inverted Screen (1 mo)    | Geno                                                                                                                                                      | $F_{(1,24)}=6.18, p=0.020$                                                                                                                                                                                                                                     |
| Platform (4-5 mos)        | Geno                                                                                                                                                      | $F_{(1,23)}=19.10, p=0.0002$                                                                                                                                                                                                                                   |
| Pole (4-5 mos)            | Geno                                                                                                                                                      | $F_{(1,23)}=16.59, p=0.0005$                                                                                                                                                                                                                                   |
| Inverted Screen (4-5 mos) | Geno                                                                                                                                                      | $F_{(1,23)}=230.88, p<0.00005$                                                                                                                                                                                                                                 |
| Ledge (4-5 mos)           | Geno<br>Sex<br>Geno x Sex                                                                                                                                 | $F_{(1,23)}=14.28, p=0.001$<br>$F_{(1,23)}=5.74, p=0.025$<br>$F_{(1,23)}=4.70, p=0.041$                                                                                                                                                                        |
| Rotarod                   |                                                                                                                                                           |                                                                                                                                                                                                                                                                |
| Stationary (1 mo)         | Geno<br>Sex<br>Geno x Trials<br>Trial 1                                                                                                                   | $F_{(1,22)}=12.29, p=0.002$<br>$F_{(1,22)}=5.70, p=0.026$<br>$F_{(2,44)}=9.32, p=0.0004$<br>$F_{(1,22)}=15.67, p=0.0007$                                                                                                                                       |
| Constant Speed (1 mo)     | Geno x Sessions<br>Session 1, Trial 1<br>Session 1, Trial 2                                                                                               | $F_{(2,44)}=4.04, p=0.024$<br>$F_{(1,22)}=4.48, p=0.046$<br>$F_{(1,22)}=6.03, p=0.022$                                                                                                                                                                         |
| Stationary (4-5 mos)      | Geno<br>Trial 1<br>Trial 2<br>Trial 3                                                                                                                     | $F_{(1,21)}=35.22, p<0.00005$<br>$F_{(1,21)}=18.39, p=0.0003$<br>$F_{(1,21)}=19.61, p=0.0002$<br>$F_{(1,21)}=17.87, p=0.0004$                                                                                                                                  |
| Constant Speed (4-5 mos)  | Geno<br>Session 1, Trial 1<br>Session 1, Trial 2<br>Session 2, Trial 1<br>Session 2, Trial 2<br>Session 3, Trial 1<br>Session 3, Trial 2                  | $F_{(1,21)}=31.91, p<0.00005$<br>$F_{(1,21)}=12.83, p=0.002$<br>$F_{(1,21)}=14.16, p=0.001$<br>$F_{(1,21)}=38.80, p<0.00005$<br>$F_{(1,21)}=26.62, p<0.00005$<br>$F_{(1,21)}=16.21, p=0.0006$<br>$F_{(1,21)}=18.60, p=0.0003$                                  |
| Accelerating (4-5 mos)    | Geno<br>Geno x Trials<br>Session 1, Trial 1<br>Session 1, Trial 2<br>Session 2, Trial 1<br>Session 2, Trial 2<br>Session 3, Trial 1<br>Session 3, Trial 2 | $F_{(1,21)}=38.65, p<0.00005$<br>$F_{(1,21)}=8.15, p=0.010$<br>$F_{(1,21)}=20.58, p=0.0002$<br>$F_{(1,21)}=33.70, p<0.00005$<br>$F_{(1,21)}=33.25, p<0.00005$<br>$F_{(1,21)}=28.75, p<0.00005$<br>$F_{(1,21)}=12.54, p=0.002$<br>$F_{(1,21)}=29.43, p<0.00005$ |
