# Supplementary material for: Neurologic Abnormalities in Mouse Models of the Lysosomal Storage Disorders Mucolipidosis II and Mucolipidosis III γ
Source: PubMed Central journal article supplement (PMC4196941; doi:10.1371/journal.pone.0109768), 2014-10-14
Supplement: pone.0109768.s002.pdf [file pone.0109768.s002.pdf]

Table S2. Significant ANOVA effects involving genotype (Geno) and sex variables from the 1-h locomotor activity test and sensorimotor battery in 4-6 and 12-14 months old *Gnptg*<sup>-/-</sup> and WT mice.

| <u>Test (Age)</u>            | <u>Effect</u>          | <u>F Statistics</u>                                        |
|------------------------------|------------------------|------------------------------------------------------------|
| 1-h Locomotor Activity       |                        |                                                            |
| Ambulations (12-14 mo)       | Geno x Time<br>Block 1 | $F_{(5,75)}=4.35, p=0.012$<br>$F_{(1,15)}=5.02, p=0.041$   |
| Rearings (12-14 mo)          | Geno<br>Block 1        | $F_{(1,15)}=4.87, p=0.043$<br>$F_{(1,15)}=4.59, p=0.049$   |
| Sensorimotor Battery         |                        |                                                            |
| 60° Incl. Screen (4-6 mo)    | Geno<br>Geno x Sex     | $F_{(1,16)}=18.84, p=0.0005$<br>$F_{(1,16)}=4.92, p=0.041$ |
| 90° Incl. Screen (4-6 mos)   | Geno                   | $F_{(1,16)}=24.65, p=0.0001$                               |
| 90° Incl. Screen (12-14 mos) | Geno<br>Geno x Sex     | $F_{(1,15)}=6.14, p=0.026$<br>$F_{(1,15)}=6.23, p=0.025$   |
| Platform (12-14 mos)         | Geno                   | $F_{(1,15)}=8.62, p=0.010$                                 |
