# Supplementary material for: Neurologic Abnormalities in Mouse Models of the Lysosomal Storage Disorders Mucolipidosis II and Mucolipidosis III γ
Source: PubMed Central journal article supplement (PMC4196941; doi:10.1371/journal.pone.0109768), 2014-10-14
Supplement: pone.0109768.s003.pdf [file pone.0109768.s003.pdf]

Table S3. Significant ANOVA effects involving genotype (Geno) and sex variables from the rotarod test in 4-6 and 12-14 months old *Gnptg*<sup>-/-</sup> and WT mice.

| <u>Test (Age)</u>          | <u>Effect</u>                     | <u>F Statistics</u>           |
|----------------------------|-----------------------------------|-------------------------------|
| Rotarod                    |                                   |                               |
| Stationary (4-6 mo)        | Geno                              | $F_{(1,16)}=6.27, p=0.024$    |
|                            | Geno x Trials                     | $F_{(2,32)}=7.85, p=0.003$    |
|                            | Sex x Trials                      | $F_{(2,32)}=4.17, p=0.030$    |
|                            | Trial 1                           | $F_{(1,16)}=9.38, p=0.007$    |
| Constant Speed (4-6 mo)    | Geno                              | $F_{(1,16)}=10.87, p=0.005$   |
|                            | Session 1, Trial 2                | $F_{(1,16)}=11.71, p=0.004$   |
|                            | Session 2, Trial 2                | $F_{(1,16)}=4.76, p=0.044$    |
|                            | Session 3, Trial 1                | $F_{(1,16)}=6.82, p=0.019$    |
| Accelerating (4-6 mos)     | Geno                              | $F_{(1,16)}=21.61, p=0.0003$  |
|                            | Geno x Session                    | $F_{(2,32)}=7.46, p=0.002$    |
|                            | Geno x Sex x Trials               | $F_{(1,16)}=11.01, p=0.004$   |
|                            | Session 1, Trial 2                | $F_{(1,16)}=20.86, p=0.0003$  |
|                            | Session 2, Trial 1                | $F_{(1,16)}=8.04, p=0.012$    |
|                            | Session 2, Trial 2                | $F_{(1,16)}=17.03, p=0.0008$  |
|                            | Session 3, Trial 1                | $F_{(1,16)}=36.73, p<0.00005$ |
|                            | Session 3, Trial 1                | $F_{(1,16)}=8.90, p=0.009$    |
| Constant Speed (12-14 mos) | Geno                              | $F_{(1,15)}=21.96, p=0.0003$  |
|                            | Session 1, Trial 2                | $F_{(1,15)}=22.42, p=0.0003$  |
|                            | Session 2, Trial 1                | $F_{(1,15)}=5.54, p=0.033$    |
|                            | Session 2, Trial 2                | $F_{(1,15)}=11.65, p=0.004$   |
| Accelerating (12-14 mos)   | Geno                              | $F_{(1,15)}=28.17, p=0.0001$  |
|                            | Geno x Sex x Trials<br>x Sessions | $F_{(2,30)}=4.71, p=0.017$    |
|                            | Session 1, Trial1                 | $F_{(1,15)}=9.78, p=0.007$    |
|                            | Session 1, Trial 2                | $F_{(1,15)}=16.71, p=0.001$   |
|                            | Session 2, Trial 1                | $F_{(1,15)}=14.57, p=0.002$   |
|                            | Session 2, Trial 2                | $F_{(1,15)}=20.64, p=0.0004$  |
|                            | Session 3, Trial 1                | $F_{(1,15)}=12.31, p=0.003$   |
|                            | Session 3, Trial 2                | $F_{(1,15)}=39.41, p<0.00005$ |
